# Supplementary material for: Changes in Plasma Short-Chain Fatty Acid Levels after Dietary Weight Loss among Overweight and Obese Adults over 50 Weeks
Source: PubMed Central journal article supplement (PMC7071291; doi:10.3390/nu12020452), 2020-02-11
Supplement: nutrients-12-00452-s001.pdf [file nutrients-12-00452-s001.pdf]

# Changes in Plasma Short-Chain Fatty Acid Levels after Dietary Weight Loss among Overweight and Obese Adults over 50 Weeks

Solomon A. Sowah <sup>1,2,\*</sup>, Frank Hirche <sup>3</sup>, Alessio Milanese <sup>4</sup>, Theron S. Johnson <sup>1</sup>, Mirja Grafetstätter <sup>1,2</sup>, Ruth Schübel <sup>1</sup>, Romy Kirsten <sup>5</sup>, Cornelia M. Ulrich <sup>6</sup>, Rudolf Kaaks <sup>1</sup>, Georg Zeller <sup>4</sup>, Tilman Kühn <sup>1</sup> and Gabriele I. Stangl <sup>3</sup>

<sup>1</sup> German Cancer Research Center (DKFZ), Division of Cancer Epidemiology, Im Neuenheimer Feld 581, 69120 Heidelberg, Germany; s.sowah@dkfz.de

<sup>2</sup> Medical Faculty, Heidelberg University, Heidelberg, Germany

<sup>3</sup> Institute of Agricultural and Nutritional Sciences, Martin Luther University Halle-Wittenberg, 06120, Halle (Saale), Germany

<sup>4</sup> European Molecular Biology Laboratory (EMBL), Structural and Computational Biology Unit, 69117 Heidelberg, Germany

<sup>5</sup> Biobank of the National Center for Tumor Diseases (NCT) Heidelberg, Heidelberg, Germany

<sup>6</sup> Huntsman Cancer Institute and Department of Population Health Sciences, University of Utah, Salt Lake City, UT 84112-5550, USA

\* Correspondence: s.sowah@dkfz.de

Received: 14 January 2020; Accepted: 06 February 2020; Published: date

Electronic Supplementary Material

**Supplemental Table S1.** Baseline Characteristics, Blood-Based Biomarkers and SCFA Concentrations of Participants according to Treatment Group <sup>1</sup>.

|                                                     | ICR ( <i>n</i> = 49, <i>w</i> = 49%) | CCR ( <i>n</i> = 49, <i>w</i> = 49%) | Control ( <i>n</i> = 52, <i>w</i> = 52%) |
|-----------------------------------------------------|--------------------------------------|--------------------------------------|------------------------------------------|
| Age, y                                              | 49.4 ± 9.0                           | 50.5 ± 8.0                           | 50.6 ± 7.1                               |
| Weight, kg                                          | 96.4 ± 15.8                          | 92.5 ± 15.7                          | 93.3 ± 13.3                              |
| Height, cm                                          | 173.3 ± 9.7                          | 171.9 ± 9.9                          | 173.1 ± 9.9                              |
| BMI, kg/m <sup>2</sup>                              | 32.0 ± 3.7                           | 31.2 ± 4.0                           | 31.1 ± 3.6                               |
| Waist circumference, cm                             | 104.7 ± 12.3                         | 103.7 ± 11.9                         | 104.2 ± 10.7                             |
| Hip circumference, cm                               | 110.5 ± 9.8                          | 108.4 ± 10.2                         | 109.7 ± 9.4                              |
| Visceral adipose tissue volume, cm <sup>3</sup>     | 4817.8 ± 1889.1                      | 4894.5 ± 2178.3                      | 4943.1 ± 2267.4                          |
| Subcutaneous adipose tissue volume, cm <sup>3</sup> | 12821.6 ± 4267.2                     | 12193.1 ± 3996.6                     | 11944.8 ± 3845.2                         |
| Liver fat, %                                        | 7.7 ± 4.6                            | 8.3 ± 8.0                            | 7.1 ± 4.7                                |
| Systolic blood pressure, mmHg                       | 139.4 ± 18.7                         | 136.0 ± 16.7                         | 136.0 ± 12.5                             |
| Diastolic blood pressure, mmHg                      | 87.2 ± 9.9                           | 87.3 ± 8.7                           | 87.8 ± 7.3                               |
| Leptin, ng/mL                                       | 25.2 ± 24.0                          | 23.3 ± 19.8                          | 25.9 ± 25.0                              |
| HOMAIR                                              | 2.7 ± 1.3                            | 3.0 ± 1.7                            | 3.0 ± 1.8                                |
| Insulin, mU/L                                       | 11.6 ± 5.4                           | 12.6 ± 6.9                           | 12.7 ± 7.3                               |
| Glucose, mg/dL                                      | 92.7 ± 7.5                           | 93.9 ± 7.5                           | 93.5 ± 7.4                               |
| IGF-1, ng/mL                                        | 108.9 ± 31.3                         | 115.1 ± 36.6                         | 121.4 ± 32.1                             |
| HbA1C, %                                            | 5.4 ± 0.3                            | 5.5 ± 0.4                            | 5.5 ± 0.2                                |
| Triglycerides, mg/dL                                | 130.0 ± 83.8                         | 121.2 ± 66.3                         | 145.0 ± 85.5                             |
| Cholesterol, mg/dL                                  | 205.0 ± 30.8                         | 202.9 ± 39.3                         | 211.8 ± 36.1                             |
| LDL cholesterol, mg/dL                              | 124.5 ± 22.4                         | 122.5 ± 31.5                         | 130.4 ± 27.3                             |
| HDL cholesterol, mg/dL                              | 54.1 ± 14.3                          | 56.2 ± 16.3                          | 51.8 ± 11.8                              |
| <b>SCFAs *</b>                                      |                                      |                                      |                                          |
| Acetate, mmol/L                                     | 5.2 ± 0.5                            | 5.3 ± 0.7                            | 5.3 ± 0.7                                |
| Propionate, μmol/L                                  | 5.8 ± 1.9                            | 5.9 ± 1.6                            | 6.0 ± 1.5                                |
| Butyrate, μmol/L                                    | 0.9 ± 0.3                            | 0.9 ± 0.4                            | 1.0 ± 0.4                                |
| Isobutyrate, μmol/L                                 | 1.9 ± 0.7                            | 2.0 ± 0.5                            | 1.9 ± 0.6                                |
| 2-Methylbutyrate, μmol/L                            | 1.1 ± 0.5                            | 1.1 ± 0.3                            | 1.1 ± 0.4                                |
| Valerate, μmol/L                                    | 0.6 ± 1.0                            | 0.4 ± 0.1                            | 0.5 ± 0.3                                |
| Isovalerate, μmol/L                                 | 3.6 ± 1.4                            | 3.4 ± 1.1                            | 3.3 ± 1.3                                |
| Caproate, μmol/L                                    | 1.5 ± 0.6                            | 1.4 ± 0.5                            | 1.6 ± 0.9                                |

<sup>1</sup> *n* = 150. Values are presented as means ± SD. ICR-intermittent calorie restriction, CCR-continuous calorie restriction; Groups were comparable at baseline in all parameters. \* Both free circulating and esterified forms of each SCFA were measured.

## Electronic Supplementary Material

**Supplemental Table S2.** Effects of Weight Loss on Plasma SCFA Concentrations between Study Arms <sup>1</sup>.

|                  |         | Baseline  | Log <sub>e</sub> Relative Change <sup>2</sup><br>(wk 12) | Log <sub>e</sub> Relative Change <sup>2</sup><br>(wk 24) | Log <sub>e</sub> Relative Change <sup>2</sup><br>(wk 50) |
|------------------|---------|-----------|----------------------------------------------------------|----------------------------------------------------------|----------------------------------------------------------|
| Acetate          | ICR     | 5.2 ± 0.5 | -3.3 ± 1.4                                               | -1.7 ± 1.6                                               | -4.4 ± 1.6                                               |
|                  | CCR     | 5.3 ± 0.7 | -4.2 ± 1.6                                               | 1.8 ± 2.2                                                | -3.6 ± 2.3                                               |
|                  | Control | 5.3 ± 0.7 | -3.7 ± 2.0                                               | -2.6 ± 1.8                                               | -2.1 ± 1.8                                               |
| Propionate       | ICR     | 5.8 ± 1.9 | 7.6 ± 3.5                                                | 9.9 ± 3.8                                                | 1.7 ± 4.2                                                |
|                  | CCR     | 5.9 ± 1.6 | 2.4 ± 2.7                                                | 5.1 ± 4.4                                                | 1.7 ± 4.2                                                |
|                  | Control | 6.0 ± 1.5 | -1.6 ± 2.5                                               | 6.3 ± 3.5                                                | 1.7 ± 3.6                                                |
| Butyrate         | ICR     | 0.9 ± 0.3 | 12.7 ± 5.1                                               | 22.9 ± 3.6                                               | 0.9 ± 5.9                                                |
|                  | CCR     | 1.0 ± 0.4 | 7.2 ± 4.2                                                | 11.2 ± 5.7                                               | -0.3 ± 5.5                                               |
|                  | Control | 1.0 ± 0.4 | -1.9 ± 3.9                                               | 6.0 ± 4.4                                                | -4.1 ± 4.2                                               |
| Isobutyrate      | ICR     | 2.0 ± 0.8 | -1.2 ± 4.1                                               | 5.6 ± 4.6                                                | 1.0 ± 2.9                                                |
|                  | CCR     | 2.0 ± 0.5 | -12.2 ± 3.2                                              | -8.1 ± 4.6                                               | -3.9 ± 4.0                                               |
|                  | Control | 1.9 ± 0.6 | -1.8 ± 2.9                                               | 6.1 ± 3.6                                                | 4.6 ± 3.6                                                |
| 2-Methylbutyrate | ICR     | 1.1 ± 0.5 | -3.2 ± 5.1                                               | 4.1 ± 6.1                                                | -0.5 ± 4.4 *                                             |
|                  | CCR     | 1.1 ± 0.3 | -11.0 ± 3.8                                              | -3.6 ± 4.1                                               | 0.1 ± 4.4                                                |
|                  | Control | 1.1 ± 0.4 | 1.6 ± 4.3                                                | 6.3 ± 4.7                                                | 12.7 ± 4.8                                               |
| Valerate         | ICR     | 0.6 ± 1.0 | 3.4 ± 3.5                                                | 11.6 ± 4.3                                               | 3.1 ± 4.7                                                |
|                  | CCR     | 0.4 ± 0.1 | 9.2 ± 4.3                                                | 15.0 ± 4.9                                               | 18.9 ± 9.5                                               |
|                  | Control | 0.5 ± 0.3 | 1.7 ± 4.3                                                | 5.9 ± 5.6                                                | 5.1 ± 5.6                                                |
| Isovalerate      | ICR     | 3.6 ± 1.4 | 2.2 ± 5.5                                                | 0.7 ± 5.8                                                | -0.6 ± 4.6                                               |
|                  | CCR     | 3.4 ± 1.1 | -3.0 ± 3.5                                               | -2.3 ± 5.0                                               | 2.9 ± 4.9                                                |
|                  | Control | 3.4 ± 1.3 | 0.2 ± 4.4                                                | 3.0 ± 4.1                                                | 11.0 ± 5.1                                               |
| Caproate         | ICR     | 1.5 ± 0.6 | 2.2 ± 4.2                                                | 11.6 ± 4.0                                               | 4.1 ± 4.0                                                |
|                  | CCR     | 1.4 ± 0.5 | 7.4 ± 4.2                                                | 17.8 ± 4.1                                               | 15.9 ± 5.6                                               |
|                  | Control | 1.6 ± 0.9 | 1.9 ± 3.4                                                | 5.0 ± 4.3                                                | 3.1 ± 5.6                                                |

<sup>1</sup> *n* = 144. Both free circulating and esterified forms of each SCFA were measured. Baseline values are means ± SD. <sup>2</sup> Means (± SEM) of individual log<sub>e</sub> relative changes between baseline and post-intervention. SCFA-short-chain fatty acid; ICR-intermittent calorie restriction; CCR-continuous calorie restriction. \* Significant difference between treatment groups.

**Supplemental Table S3.** Summary of Multiple Regression Analysis for Variables Predicting Acetate Concentrations at week 12, 24 and 50 <sup>1</sup>.

| <b>Dependent Variable: T1_Acetate, n = 138</b> |         |      |                 |                       |
|------------------------------------------------|---------|------|-----------------|-----------------------|
| <b>Predictors</b>                              | $\beta$ | SE   | <i>p</i> -Value | <i>R</i> <sup>2</sup> |
| Intercept                                      | 2.26    | 0.53 | 0.0001          | .                     |
| T0_Acetate                                     | 0.59    | 0.08 | 0.0001          | 0.26                  |
| Age, y                                         | -0.01   | 0.01 | 0.0887          | 0.01                  |
| sex 1                                          | -0.10   | 0.10 | 0.3116          | 0.00                  |
| sex 2                                          | 0.00    | .    | .               | .                     |
| Q1                                             | 0.51    | 0.14 | 0.0004          | 0.06                  |
| Q2                                             | 0.22    | 0.14 | 0.1071          | 0.01                  |
| Q3                                             | 0.33    | 0.14 | 0.0166          | 0.03                  |
| Q4                                             | 0.00    | .    | .               | .                     |
| ICR                                            | 0.12    | 0.12 | 0.3295          | 0.00                  |
| CCR                                            | 0.02    | 0.11 | 0.8933          | 0.00                  |
| Control                                        | 0.00    | .    | .               | .                     |
| <b>Dependent Variable: T2_Acetate, n = 131</b> |         |      |                 |                       |
| <b>Predictors</b>                              | $\beta$ | SE   | <i>p</i> -value | <i>R</i> <sup>2</sup> |
| Intercept                                      | 0.83    | 0.62 | 0.1867          | .                     |
| T0_Acetate                                     | 0.82    | 0.09 | 0.0001          | 0.35                  |
| Age, y                                         | 0.00    | 0.01 | 0.7966          | 0.00                  |
| sex 1                                          | -0.08   | 0.12 | 0.4739          | 0.00                  |
| sex 2                                          | 0.00    | .    | .               | .                     |
| Q1                                             | 0.23    | 0.17 | 0.1783          | 0.01                  |
| Q2                                             | 0.13    | 0.17 | 0.4563          | 0.00                  |
| Q3                                             | 0.26    | 0.16 | 0.1077          | 0.01                  |
| Q4                                             | 0.00    | .    | .               | .                     |
| ICR                                            | 0.05    | 0.14 | 0.7097          | 0.00                  |
| CCR                                            | 0.19    | 0.14 | 0.1715          | 0.01                  |
| Control                                        | 0.00    | .    | .               | .                     |
| <b>Dependent variable: T3_Acetate, n = 130</b> |         |      |                 |                       |
| <b>Predictors</b>                              | $\beta$ | SE   | <i>p</i> -Value | <i>R</i> <sup>2</sup> |
| Intercept                                      | 1.53    | 0.56 | 0.0075          | .                     |
| T0_Acetate                                     | 0.62    | 0.08 | 0.0001          | 0.26                  |
| Age, y                                         | 0.01    | 0.01 | 0.3935          | 0.00                  |
| sex 1                                          | -0.15   | 0.10 | 0.1596          | 0.01                  |
| sex 2                                          | 0.00    | .    | .               | .                     |
| Q1                                             | 0.27    | 0.15 | 0.0870          | 0.02                  |
| Q2                                             | 0.04    | 0.15 | 0.7967          | 0.00                  |
| Q3                                             | 0.35    | 0.15 | 0.0186          | 0.03                  |
| Q4                                             | 0.00    | .    | .               | .                     |
| ICR                                            | -0.10   | 0.13 | 0.4199          | 0.00                  |
| CCR                                            | -0.08   | 0.13 | 0.5072          | 0.00                  |
| Control                                        | 0.00    | .    | .               | .                     |

<sup>1</sup> T0\_Acetate, T1\_Acetate, T2\_Acetate, and T3\_Acetate—acetate concentrations at baseline, wk 12, wk 24 and wk 50 respectively. Q1, Q2, Q3 and Q4—weight loss quartiles 1, 2, 3, and 4 respectively; ICR, CCR and

Electronic Supplementary Material

Control-intermittent calorie restriction, continuous calorie restriction, and control groups respectively of the initial study arms; sex 1-male, sex 2-female.  $R^2$ -squared semi-partial correlation coefficient.

**Supplemental Table S4.** Summary of Multiple Regression Analysis for Variables Predicting Propionate Concentrations at Week 12, 24 and 50 <sup>1</sup>.

| <b>Dependent Variable: T1_Propionate, n = 138</b> |                           |           |                |                      |
|---------------------------------------------------|---------------------------|-----------|----------------|----------------------|
| <b>Predictors</b>                                 | <b><math>\beta</math></b> | <b>SE</b> | <b>p-Value</b> | <b>R<sup>2</sup></b> |
| Intercept                                         | 1.66                      | 0.72      | 0.0235         | .                    |
| T0_Propionate                                     | 0.78                      | 0.06      | 0.0001         | 0.58                 |
| Age, y                                            | -0.01                     | 0.01      | 0.6461         | 0.00                 |
| sex 1                                             | 0.07                      | 0.19      | 0.7020         | 0.00                 |
| sex 2                                             | 0.00                      | .         | .              | .                    |
| Q1                                                | -0.17                     | 0.28      | 0.5298         | 0.00                 |
| Q2                                                | -0.12                     | 0.28      | 0.6600         | 0.00                 |
| Q3                                                | -0.34                     | 0.27      | 0.2106         | 0.00                 |
| Q4                                                | 0.00                      | .         | .              | .                    |
| ICR                                               | 0.38                      | 0.24      | 0.1130         | 0.01                 |
| CCR                                               | 0.25                      | 0.23      | 0.2719         | 0.00                 |
| Control                                           | 0.00                      | .         | .              | .                    |
| <b>Dependent Variable: T2_Propionate, n = 131</b> |                           |           |                |                      |
| <b>Predictors</b>                                 | <b><math>\beta</math></b> | <b>SE</b> | <b>p-Value</b> | <b>R<sup>2</sup></b> |
| Intercept                                         | 2.51                      | 1.25      | 0.0476         | .                    |
| T0_Propionate                                     | 0.81                      | 0.10      | 0.0001         | 0.36                 |
| Age, y                                            | 0.00                      | 0.02      | 0.9606         | 0.00                 |
| sex 1                                             | -0.65                     | 0.32      | 0.0432         | 0.02                 |
| sex 2                                             | 0.00                      | .         | .              | .                    |
| Q1                                                | -0.47                     | 0.48      | 0.3357         | 0.00                 |
| Q2                                                | -0.42                     | 0.49      | 0.3915         | 0.00                 |
| Q3                                                | -0.62                     | 0.47      | 0.1888         | 0.01                 |
| Q4                                                | 0.00                      | .         | .              | .                    |
| ICR                                               | -0.21                     | 0.41      | 0.6111         | 0.00                 |
| CCR                                               | -0.08                     | 0.40      | 0.8456         | 0.00                 |
| Control                                           | 0.00                      | .         | .              | .                    |
| <b>Dependent Variable: T3_Propionate, n = 130</b> |                           |           |                |                      |
| <b>Predictors</b>                                 | <b><math>\beta</math></b> | <b>SE</b> | <b>p-Value</b> | <b>R<sup>2</sup></b> |
| Intercept                                         | 2.35                      | 0.87      | 0.0075         | .                    |
| T0_Propionate                                     | 0.55                      | 0.06      | 0.0001         | 0.36                 |
| Age, y                                            | 0.02                      | 0.01      | 0.3008         | 0.01                 |
| sex 1                                             | -0.33                     | 0.22      | 0.1299         | 0.01                 |
| sex 2                                             | 0.00                      | .         | .              | .                    |
| Q1                                                | -0.19                     | 0.33      | 0.5686         | 0.00                 |
| Q2                                                | -0.09                     | 0.33      | 0.7912         | 0.00                 |
| Q3                                                | -0.38                     | 0.32      | 0.2331         | 0.01                 |
| Q4                                                | 0.00                      | .         | .              | .                    |
| ICR                                               | -0.21                     | 0.27      | 0.4410         | 0.00                 |
| CCR                                               | 0.08                      | 0.27      | 0.7819         | 0.00                 |
| Control                                           | 0.00                      | .         | .              | .                    |

## Electronic Supplementary Material

<sup>1</sup> T0\_Propionate, T1\_Propionate, T2\_Propionate, and T3\_Propionate–propionate concentrations at baseline, wk 12, wk 24 and wk 50 respectively. Q1, Q2, Q3 and Q4–weight loss quartiles 1, 2, 3, and 4 respectively; ICR, CCR and Control–intermittent calorie restriction, continuous calorie restriction, and control groups respectively of the initial study arms; sex 1-male, sex 2-female.  $R^2$ –squared semipartial correlation coefficient.

Electronic Supplementary Material

Supplemental Table S5. Summary of Multiple Regression Analysis for Variables Predicting Butyrate Concentrations at Week 12, 24 and 50 <sup>1</sup>.

| <b>Dependent Variable: T1_Butyrate, n = 138</b> |                           |           |                |                      |
|-------------------------------------------------|---------------------------|-----------|----------------|----------------------|
| <b>Predictors</b>                               | <b><math>\beta</math></b> | <b>SE</b> | <b>p-Value</b> | <b>R<sup>2</sup></b> |
| Intercept                                       | 0.48                      | 0.18      | 0.0099         | .                    |
| T0_Butyrate                                     | 0.59                      | 0.07      | 0.0001         | 0.33                 |
| Age, y                                          | 0.00                      | 0.00      | 0.6062         | 0.00                 |
| sex 1                                           | 0.08                      | 0.05      | 0.1078         | 0.01                 |
| sex 2                                           | 0.00                      | .         | .              | .                    |
| Q1                                              | -0.01                     | 0.07      | 0.9105         | 0.00                 |
| Q2                                              | -0.02                     | 0.08      | 0.7467         | 0.00                 |
| Q3                                              | -0.07                     | 0.07      | 0.3530         | 0.00                 |
| Q4                                              | 0.00                      | .         | .              | .                    |
| ICR                                             | 0.04                      | 0.06      | 0.4937         | 0.00                 |
| CCR                                             | 0.03                      | 0.06      | 0.6665         | 0.00                 |
| Control                                         | 0.00                      | .         | .              | .                    |

  

| <b>Dependent Variable: T2_Butyrate, n = 131</b> |                           |           |                |                      |
|-------------------------------------------------|---------------------------|-----------|----------------|----------------------|
| <b>Predictors</b>                               | <b><math>\beta</math></b> | <b>SE</b> | <b>p-Value</b> | <b>R<sup>2</sup></b> |
| Intercept                                       | 0.24                      | 0.22      | 0.2944         | .                    |
| T0_Butyrate                                     | 0.78                      | 0.09      | 0.0001         | 0.39                 |
| Age, y                                          | 0.00                      | 0.00      | 0.6386         | 0.00                 |
| sex 1                                           | -0.11                     | 0.06      | 0.0829         | 0.01                 |
| sex 2                                           | 0.00                      | .         | .              | .                    |
| Q1                                              | 0.09                      | 0.09      | 0.3039         | 0.01                 |
| Q2                                              | -0.04                     | 0.09      | 0.7005         | 0.00                 |
| Q3                                              | 0.00                      | 0.09      | 0.9628         | 0.00                 |
| Q4                                              | 0.00                      | .         | .              | .                    |
| ICR                                             | 0.11                      | 0.08      | 0.1438         | 0.01                 |
| CCR                                             | 0.05                      | 0.08      | 0.4978         | 0.00                 |
| Control                                         | 0.00                      | 0.22      | .              | .                    |

  

| <b>Dependent Variable: T3_Butyrate, n = 130</b> |                           |           |                |                      |
|-------------------------------------------------|---------------------------|-----------|----------------|----------------------|
| <b>Predictors</b>                               | <b><math>\beta</math></b> | <b>SE</b> | <b>p-Value</b> | <b>R<sup>2</sup></b> |
| Intercept                                       | 0.18                      | 0.20      | 0.3777         | .                    |
| T0_Butyrate                                     | 0.50                      | 0.08      | 0.0001         | 0.24                 |
| Age, y                                          | 0.00                      | 0.00      | 0.2714         | 0.01                 |
| sex 1                                           | -0.01                     | 0.05      | 0.9138         | 0.00                 |
| sex 2                                           | 0.00                      | .         | .              | .                    |
| Q1                                              | 0.12                      | 0.08      | 0.1543         | 0.01                 |
| Q2                                              | 0.11                      | 0.08      | 0.1654         | 0.01                 |
| Q3                                              | 0.00                      | 0.08      | 0.9767         | 0.00                 |
| Q4                                              | 0.00                      | .         | .              | .                    |
| ICR                                             | 0.04                      | 0.07      | 0.5780         | 0.00                 |
| CCR                                             | 0.04                      | 0.07      | 0.5927         | 0.00                 |
| Control                                         | 0.00                      | .         | .              | .                    |

<sup>1</sup> T0\_Butyrate, T1\_Butyrate, T2\_Butyrate, and T3\_Butyrate—butyrate concentrations at baseline, wk 12, wk 24 and wk 50 respectively. Q1, Q2, Q3 and Q4—weight loss quartiles 1, 2, 3, and 4 respectively; ICR, CCR

## Electronic Supplementary Material

and Control–intermittent calorie restriction, continuous calorie restriction, and control groups respectively of the initial study arms; sex 1-male, sex 2-female.  $R^2$ -squared semi-partial correlation coefficient.



## Electronic Supplementary Material

**Supplemental Table S6.** Reported Energy and Macronutrient Intake at Baseline, and Reported Relative Changes Across Quartiles over Time at Week 12 and 50 <sup>1</sup>.

|                    |    | Baseline       | Log <sub>e</sub> Relative Change <sup>2</sup> (wk 12) | Log <sub>e</sub> Relative Change <sup>2</sup> (wk 50) |
|--------------------|----|----------------|-------------------------------------------------------|-------------------------------------------------------|
| Energy [kcal/d]    | Q1 | 1834 ± 527.7   | -15.5 ± 5.0                                           | -15.4 ± 8.4                                           |
|                    | Q2 | 2069.7 ± 572.2 | -22.5 ± 4.3                                           | -23.1 ± 4.6                                           |
|                    | Q3 | 2185.4 ± 621.8 | -27.6 ± 3.4                                           | -12.2 ± 10.8                                          |
|                    | Q4 | 2016.1 ± 563.2 | -37.8 ± 5.2                                           | -17.4 ± 6.9                                           |
| Fat [g/d]          | Q1 | 70.9 ± 22.9    | -24.5 ± 6.7                                           | -8.5 ± 11.5                                           |
|                    | Q2 | 81.6 ± 26.2    | -35.0 ± 6.3                                           | -25.6 ± 6.5                                           |
|                    | Q3 | 90.8 ± 30.8    | -47.1 ± 5.1                                           | -21.5 ± 10.3                                          |
|                    | Q4 | 83.7 ± 31.3    | -59.4 ± 6.3                                           | -37.3 ± 9.0                                           |
| Protein [g/d]      | Q1 | 69.4 ± 27.7    | -4.0 ± 4.3                                            | 3.9 ± 8.8                                             |
|                    | Q2 | 78.1 ± 24.7    | -11.3 ± 5.0                                           | -15.2 ± 5.6                                           |
|                    | Q3 | 79.6 ± 17.9    | -17.3 ± 3.9                                           | -3.7 ± 9.5                                            |
|                    | Q4 | 75.5 ± 23.6    | -24.4 ± 6.0                                           | -11.1 ± 7.8                                           |
| Carbohydrate [g/d] | Q1 | 199 ± 63.7     | -14.4 ± 7.0                                           | -16.8 ± 8.5                                           |
|                    | Q2 | 223 ± 64.8     | -19.7 ± 4.7                                           | -15.6 ± 4.9                                           |
|                    | Q3 | 227.2 ± 78.7   | -17.4 ± 4.8                                           | -2.3 ± 13.2                                           |
|                    | Q4 | 212.2 ± 62.9   | -26.9 ± 5.5                                           | -2.6 ± 6.7                                            |
| Fiber [g/d]        | Q1 | 15.5 ± 6.2     | 12.9 ± 7.0                                            | 5.7 ± 9.5                                             |
|                    | Q2 | 19 ± 6.3       | 11.9 ± 5.4                                            | 10.2 ± 7.3                                            |
|                    | Q3 | 17.9 ± 7       | 19.2 ± 6.9                                            | 22.5 ± 12.9                                           |
|                    | Q4 | 18 ± 7.5       | 19.7 ± 7.4                                            | 27.8 ± 10.4                                           |
| Alcohol [g/d]      | Q1 | 11.2 ± 14.5    | -32.1 ± 34.0                                          | -54.5 ± 37.1                                          |
|                    | Q2 | 11.1 ± 14      | -15.5 ± 19.9                                          | -73.8 ± 29.7                                          |
|                    | Q3 | 13 ± 13.5      | -96.2 ± 37.1                                          | -90.9 ± 39.1                                          |
|                    | Q4 | 8.8 ± 10.1     | -160.7 ± 36.9                                         | -73.0 ± 60.3                                          |

<sup>1</sup> *n* = 144. Q1-quartile 1; Q2-quartile 2; Q3-quartile 3; Q4-quartile 4. Baseline values are means ± SD. <sup>2</sup> Means (±SEM) of individual loge relative changes between baseline and post-intervention.

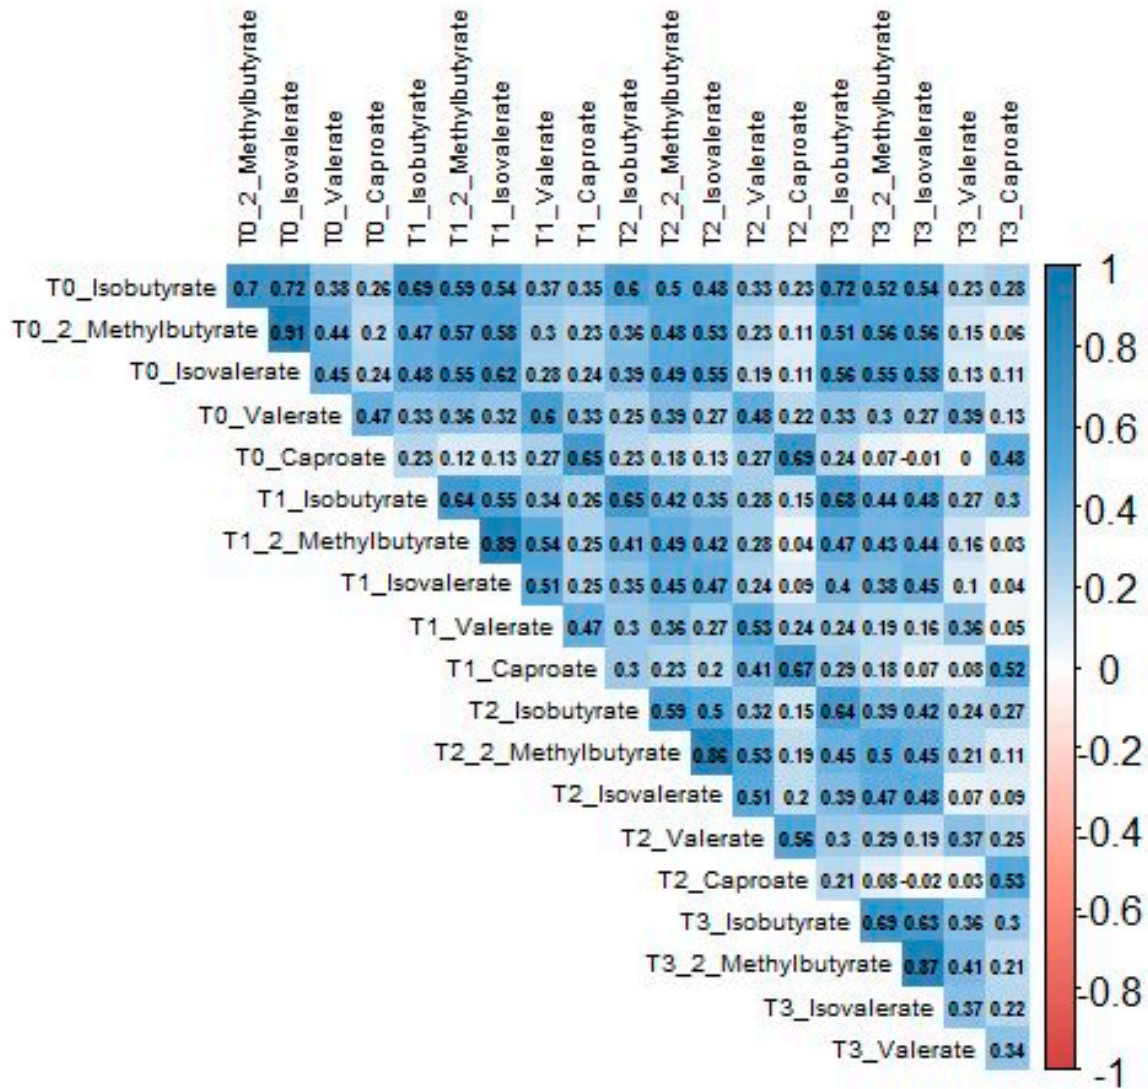

**Supplemental Figure S1.** Correlations between other SCFAs across time points. T0-baseline, T1-week 12, T2-week 24, T3-week 50.

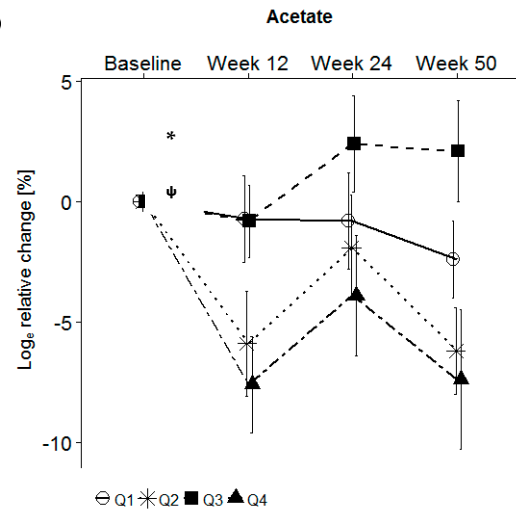

(a)

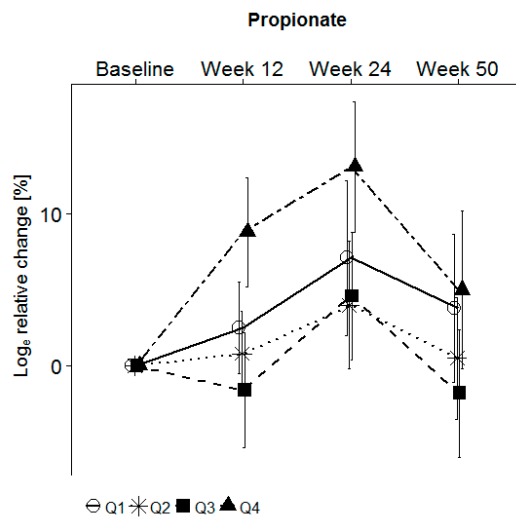

(b)

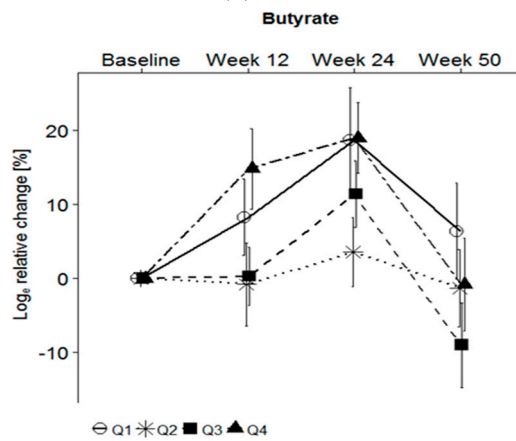

(c)

**Supplemental Figure S2.** (a) Changes in acetate according to weight loss quartiles; (b) Changes in propionate according to weight loss quartiles; (c) Changes in butyrate according to weight loss. Data are shown as means±SEM of loge percentage changes. Q1, Q2, Q3, Q4 are quartile 1, 2, 3 and 4 respectively. \* Significant difference across all quartiles at week 12; ψ Significant difference between Q1 and Q4 at week 12.
